# Supplementary material
Source: HighWire-hosted journal article supplement (https://bmjopen.bmj.com/content/10/9/e035880)
Supplement: inline-supplementary-material-1 [file inline-supplementary-material-1.pdf]

**Supplemental Table**

Table S1. Hazard ratios and 95% confidence interval (CI) for risk of new on-set gallstone disease among participants stratified by hs-CRP subgroups (excluding participants with hs-CRP&gt;10 mg/L).

|                     | <1 mg/L       | 1-3 mg/L        | >3 mg/L         | <i>P</i> for trend |
|---------------------|---------------|-----------------|-----------------|--------------------|
| <b>Cases</b>        | 1990          | 1209            | 808             |                    |
| <b>Person-years</b> | 332,764       | 149,212         | 87,463          |                    |
| <b>Model 1</b>      | 1 (Reference) | 1.33(1.24~1.43) | 1.59(1.47~1.73) | <0.001             |
| <b>Model 2</b>      | 1 (Reference) | 1.18(1.10~1.26) | 1.24(1.15~1.35) | <0.001             |
| <b>Model 3</b>      | 1 (Reference) | 1.11(1.03~1.19) | 1.13(1.03~1.23) | <0.001             |

Note: Model 1: Univariate analysis.

Model 2: Adjusted for age (per 1 year), sex based on model 1.

Model 3: Further adjusted for TC (per 1 mmol/L), TG (per 1 mmol/L), BMI (per 1 Kg/m<sup>2</sup>), ALT (per 1 IU/L), current smoker (yes/no), drinking status (yes/no), diabetes( yes/no), hypertension (yes/no), physical activity (yes/no), based on model 2.
